# Supplementary material for: Association of New Use of Antihypertensives That Stimulate vs Inhibit Type 2 and 4 Angiotensin II Receptors With Dementia Among Medicare Beneficiaries
Source: PubMed Central journal article supplement (PMC9856661; doi:10.1001/jamanetworkopen.2022.49370), 2023-01-04
Supplement: jamanetwopen-e2249370-s001.pdf [file jamanetwopen-e2249370-s001.pdf]

## Supplementary Online Content

Marcum ZA, Gabriel N, Bress AP, Hernandez I. Association of new use of antihypertensives that stimulate vs inhibit type 2 and 4 angiotensin II receptors with dementia among Medicare beneficiaries. *JAMA Netw Open*. 2023;6(1):e2249370. doi:10.1001/jamanetworkopen.2022.49370

**eTable 1.** Antihypertensive Medications (Generic Name) by Category

**eTable 2.** *ICD-9* and *ICD-10* Diagnosis Codes for Hypertension

**eTable 3.** *ICD-9* and *ICD-10* Diagnosis Codes for ADRD

**eTable 4.** Medications (Generic Names) in the Anticholinergic Cognitive Burden Score (Values of 2 or 3)

**eTable 5.** Follow-up and Incidence Density Rates of the Secondary Outcome, by Time-Dependent Treatment Group

**eTable 6.** Individuals in Exposure Groups by Time Period After Index Date, Among Those Remaining in the Study

**eFigure 1.** Flowchart of Sample Selection

**eFigure 2.** Sankey Diagram of Exposure Groups by Time Period After Index Date

**eFigure 3.** Results of Sensitivity Analysis - Multivariable Cox Proportional Hazards Model for Primary (ADRD) and Secondary (Vascular Dementia) Outcomes

This supplementary material has been provided by the authors to give readers additional information about their work.

**eTable 1.** Antihypertensive Medications (Generic Name) by Category

| Angiotensin II type 2 and 4 stimulating                                                                                                                                                                                                                                                                                                                                                         | Angiotensin II type 2 and 4 inhibiting                                                                                                                                                                                                                                                                                                                                                                   | Other                                                                                                                                                                                                                                                                                                                                                                                                                                                                                                                                                                                                                                                            |
|-------------------------------------------------------------------------------------------------------------------------------------------------------------------------------------------------------------------------------------------------------------------------------------------------------------------------------------------------------------------------------------------------|----------------------------------------------------------------------------------------------------------------------------------------------------------------------------------------------------------------------------------------------------------------------------------------------------------------------------------------------------------------------------------------------------------|------------------------------------------------------------------------------------------------------------------------------------------------------------------------------------------------------------------------------------------------------------------------------------------------------------------------------------------------------------------------------------------------------------------------------------------------------------------------------------------------------------------------------------------------------------------------------------------------------------------------------------------------------------------|
| amlodipine<br>azilsartan<br>bendroflumethiazide<br>candesartan<br>chlorothiazide<br>chlorthalidone<br>eprosartan<br>felodipine<br>hydrochlorothiazide<br>hydroflumethiazide<br>indapamide<br>irbesartan<br>isradipine<br>losartan<br>methyclothiazide<br>nicardipine<br>nifedipine<br>nimodipine<br>nisoldipine<br>olmesartan<br>polythiazide<br>telmisartan<br>trichlormethiazide<br>valsartan | acebutolol<br>atenolol<br>benazepril<br>bepridil<br>betaxolol<br>bisoprolol<br>captopril<br>carteolol<br>carvedilol<br>diltiazem<br>enalapril<br>fosinopril<br>labetalol<br>lisinopril<br>metoprolol<br>mibefradil<br>moexipril<br>nadolol<br>nebivolol<br>penbutolol<br>perindopril<br>pindolol<br>propranolol<br>quinapril<br>ramipril<br>sotalol<br>timolol<br>trandolapril<br>verapamil<br>verapamil | acetazolamide<br>aliskiren<br>ambrisentan<br>amiloride<br>bosentan<br>bumetanide<br>clonidine<br>deserpidine<br>dipyridamole<br>doxazosin<br>eplerenone<br>ergoloid mesylates<br>ethacrynic acid<br>ethaverine<br>furosemide<br>guanabenz<br>guanadrel<br>guanethidine<br>guanfacine<br>hydralazine<br>isoxsuprine<br>Macitentan<br>mannitol<br>mecamylamine<br>methyl dopa<br>metolazone<br>minoxidil<br>pamabrom<br>papaverine<br>papaverine<br>phenoxybenzamine<br>prazosin<br>rauwolfia serpentina<br>reserpine<br>riociguat<br>sacubitril<br>selexipag<br>spironolactone<br>terazosin<br>tolvaptan<br>torsemide<br>torsemide<br>treprostinil<br>triamterene |

**eTable 2.** *ICD-9* and *ICD-10* Diagnosis Codes for Hypertension

|               |                                                                                                                                                                                                                                                                                    |
|---------------|------------------------------------------------------------------------------------------------------------------------------------------------------------------------------------------------------------------------------------------------------------------------------------|
| <b>ICD-9</b>  | 362.11, 401.0, 401.1, 401.9, 402.00, 402.01, 402.10, 402.11, 402.90, 402.91, 403.00, 403.01, 403.10, 403.11, 403.90, 403.91, 404.00, 404.01, 404.02, 404.03, 404.10, 404.11, 404.12, 404.13, 404.90, 404.91, 404.92, 404.93, 405.01, 405.09, 405.11, 405.19, 405.91, 405.99, 437.2 |
| <b>ICD-10</b> | H35.031, H35.032, H35.033, H35.039, I10, I11.0, I11.9, I12.0, I12.9, I13.0, I13.10, I13.11, I13.2, I15.0, I15.1, I15.2, I15.8, I15.9, I67.4, N26.2                                                                                                                                 |

**eTable 3.** ICD-9 and ICD-10 Diagnosis Codes for ADRD

|                              |                                                                                                                                                                                      |
|------------------------------|--------------------------------------------------------------------------------------------------------------------------------------------------------------------------------------|
| <b>ICD-9 (any position)</b>  | 331.0, 331.11, 331.19, 331.2, 331.7, 290.0, 290.10, 290.11, 290.12, 290.13, 290.20, 290.21, 290.3, 290.40, 290.41, 290.42, 290.43, 294.0, 294.10, 294.11, 294.20, 294.21, 294.8, 797 |
| <b>ICD-10 (any position)</b> | F01.50, F01.51, F02.80, F02.81, F03.90, F03.91, F04, F05, F06.1, F06.8, G13.8, G30.0, G30.1, G30.8, G30.9, G31.01, G31.09, G31.1, G31.2, G94, R41.81, R54                            |

**Source:** <https://www2.ccwdata.org/web/guest/condition-categories-chronic>

**eTable 4.** Medications (Generic Names) in the Anticholinergic Cognitive Burden Score (Values of 2 or 3)

| <b>Anticholinergic Cognitive Burden Scale</b> |
|-----------------------------------------------|
| <b>Generic name</b>                           |
| Amitriptyline                                 |
| Amoxapine                                     |
| Atropine                                      |
| Benztropine                                   |
| Brompheniramine                               |
| Carbinoxamine                                 |
| Chlorpheniramine                              |
| Chlorpromazine                                |
| Clemastine                                    |
| Clomipramine                                  |
| Clozapine                                     |
| Darifenacin                                   |
| Desipramine                                   |
| Dicyclomine                                   |
| Dimenhydrinate                                |
| Diphenhydramine                               |
| Doxepin                                       |
| Doxylamine                                    |
| Fesoterodine                                  |
| Flavoxate                                     |
| Hydroxyzine                                   |
| Hyoscyamine                                   |
| Imipramine                                    |
| Meclizine                                     |
| Methocarbamol                                 |
| Nortriptyline                                 |
| Olanzapine                                    |
| Orphenadrine                                  |
| Oxybutynin                                    |
| Paroxetine                                    |
| Perphenazine                                  |
| Promethazine                                  |
| Propantheline                                 |
| Propiverine                                   |
| Quetiapine                                    |
| Scopolamine                                   |
| Solifenacin                                   |
| Thioridazine                                  |
| Tolterodine                                   |
| Trifluoperazine                               |
| Trihexyphenidyl                               |

|                     |
|---------------------|
| Trimipramine        |
| Trospium            |
| Amantadine          |
| Belladonna Multiple |
| Carbamazepine       |
| Cyclobenzaprine     |
| Cyproheptadine      |
| Loxapine            |
| Meperidine          |
| Methotrimeprazine   |
| Molindone           |
| Nefopam             |
| Oxcarbazepine       |
| Pimozide            |

| <b>eTable 5.</b> Follow-up and Incidence Density Rates of the Secondary Outcome, by Time-Dependent Treatment Group <sup>a</sup>                                                                                                                                                                                                                                                                                                                                                                                                                                                                                   |                              |                             |                  |                  |
|-------------------------------------------------------------------------------------------------------------------------------------------------------------------------------------------------------------------------------------------------------------------------------------------------------------------------------------------------------------------------------------------------------------------------------------------------------------------------------------------------------------------------------------------------------------------------------------------------------------------|------------------------------|-----------------------------|------------------|------------------|
| <b>Follow-up</b>                                                                                                                                                                                                                                                                                                                                                                                                                                                                                                                                                                                                  | <b>AT2R/AT4R Stimulating</b> | <b>AT2R/AT4R Inhibiting</b> | <b>Mixed</b>     | <b>Non-Users</b> |
| <b>At year 3</b>                                                                                                                                                                                                                                                                                                                                                                                                                                                                                                                                                                                                  | -                            | -                           | -                | -                |
| <b>Patient-years</b>                                                                                                                                                                                                                                                                                                                                                                                                                                                                                                                                                                                              | 20478                        | 36760                       | 13245            | 98452            |
| <b>No. patients newly diagnosed with vascular dementia</b>                                                                                                                                                                                                                                                                                                                                                                                                                                                                                                                                                        | 14                           | 55                          | 14               | 86               |
| <b>Cumulative incidence per 100 person- years (95% CI)</b>                                                                                                                                                                                                                                                                                                                                                                                                                                                                                                                                                        | 0.07 (0.04-0.12)             | 0.15 (0.12-0.20)            | 0.11 (0.06-0.18) | 0.09 (0.07-0.11) |
| <b>At year 6</b>                                                                                                                                                                                                                                                                                                                                                                                                                                                                                                                                                                                                  | -                            | -                           | -                | -                |
| <b>Patient-years</b>                                                                                                                                                                                                                                                                                                                                                                                                                                                                                                                                                                                              | 44159                        | 75285                       | 30110            | 158359           |
| <b>No. patients newly diagnosed with vascular dementia</b>                                                                                                                                                                                                                                                                                                                                                                                                                                                                                                                                                        | 79                           | 221                         | 73               | 368              |
| <b>Cumulative incidence per 100 person- years (95% CI)</b>                                                                                                                                                                                                                                                                                                                                                                                                                                                                                                                                                        | 0.18 (0.14-0.22)             | 0.29 (0.26-0.34)            | 0.24 (0.19-0.31) | 0.23 (0.21-0.26) |
| <b>At year 9</b>                                                                                                                                                                                                                                                                                                                                                                                                                                                                                                                                                                                                  | -                            | -                           | -                | -                |
| <b>Patient-years</b>                                                                                                                                                                                                                                                                                                                                                                                                                                                                                                                                                                                              | 60647                        | 101661                      | 43199            | 188808           |
| <b>No. patients newly diagnosed with vascular dementia</b>                                                                                                                                                                                                                                                                                                                                                                                                                                                                                                                                                        | 146                          | 406                         | 153              | 602              |
| <b>Cumulative incidence per 100 person- years (95% CI)</b>                                                                                                                                                                                                                                                                                                                                                                                                                                                                                                                                                        | 0.24 (0.21-0.28)             | 0.40 (0.36-0.44)            | 0.35 (0.30-0.42) | 0.32 (0.29-0.35) |
| <b>At study end</b>                                                                                                                                                                                                                                                                                                                                                                                                                                                                                                                                                                                               | -                            | -                           | -                | -                |
| <b>Patient-years</b>                                                                                                                                                                                                                                                                                                                                                                                                                                                                                                                                                                                              | 66796                        | 111155                      | 48603            | 198640           |
| <b>No. patients newly diagnosed with vascular dementia</b>                                                                                                                                                                                                                                                                                                                                                                                                                                                                                                                                                        | 187                          | 513                         | 179              | 725              |
| <b>Cumulative incidence per 100 person- years (95% CI)</b>                                                                                                                                                                                                                                                                                                                                                                                                                                                                                                                                                        | 0.28 (0.24-0.32)             | 0.46 (0.42-0.50)            | 0.37 (0.32-0.43) | 0.37 (0.34-0.39) |
| Abbreviations: AT2R, angiotensin II receptor type 2; AT4R, angiotensin II receptor type 4; CI, confidence interval                                                                                                                                                                                                                                                                                                                                                                                                                                                                                                |                              |                             |                  |                  |
| <sup>a</sup> Treatment group was defined in a time dependent fashion, at each 30-day interval. Angiotensin II receptor type 2 and 4-stimulating antihypertensives defined as use of angiotensin II receptor blockers, dihydropyridine calcium channel blockers, and/or thiazides. Angiotensin II receptor type 2 and 4-inhibiting antihypertensives defined as use of angiotensin-converting enzyme inhibitors, β-blockers, and/or non-dihydropyridine calcium channel blockers. Mixed antihypertensive users defined as both angiotensin II receptor type 2 and 4-stimulating and -inhibiting antihypertensives. |                              |                             |                  |                  |

**eTable 6.** Individuals in Exposure Groups by Time Period After Index Date, Among Those Remaining in the Study

|                             | Year 0         | Year 3         | Year 6         | Year 9        |
|-----------------------------|----------------|----------------|----------------|---------------|
| Stimulating, n (% of total) | 4,879 (8.4%)   | 7,917 (15.4%)  | 6,434 (18.5%)  | 3,377 (20.1%) |
| Inhibiting, n (% of total)  | 10,302 (17.8%) | 12,981 (25.3%) | 10,220 (29.4%) | 5,248 (31.2%) |
| Mixed, n (% of total)       | 2,179 (3.8%)   | 5,382 (10.5%)  | 4,861 (14.0%)  | 2,795 (16.6%) |
| None, n (% of total)        | 40,413 (70.0%) | 24,977 (48.7%) | 13,268 (38.1%) | 5,407 (32.1%) |
| Total, n                    | 57,773         | 51,257         | 34,783         | 16,827        |



**eFigure 1.** Flowchart of Sample Selection

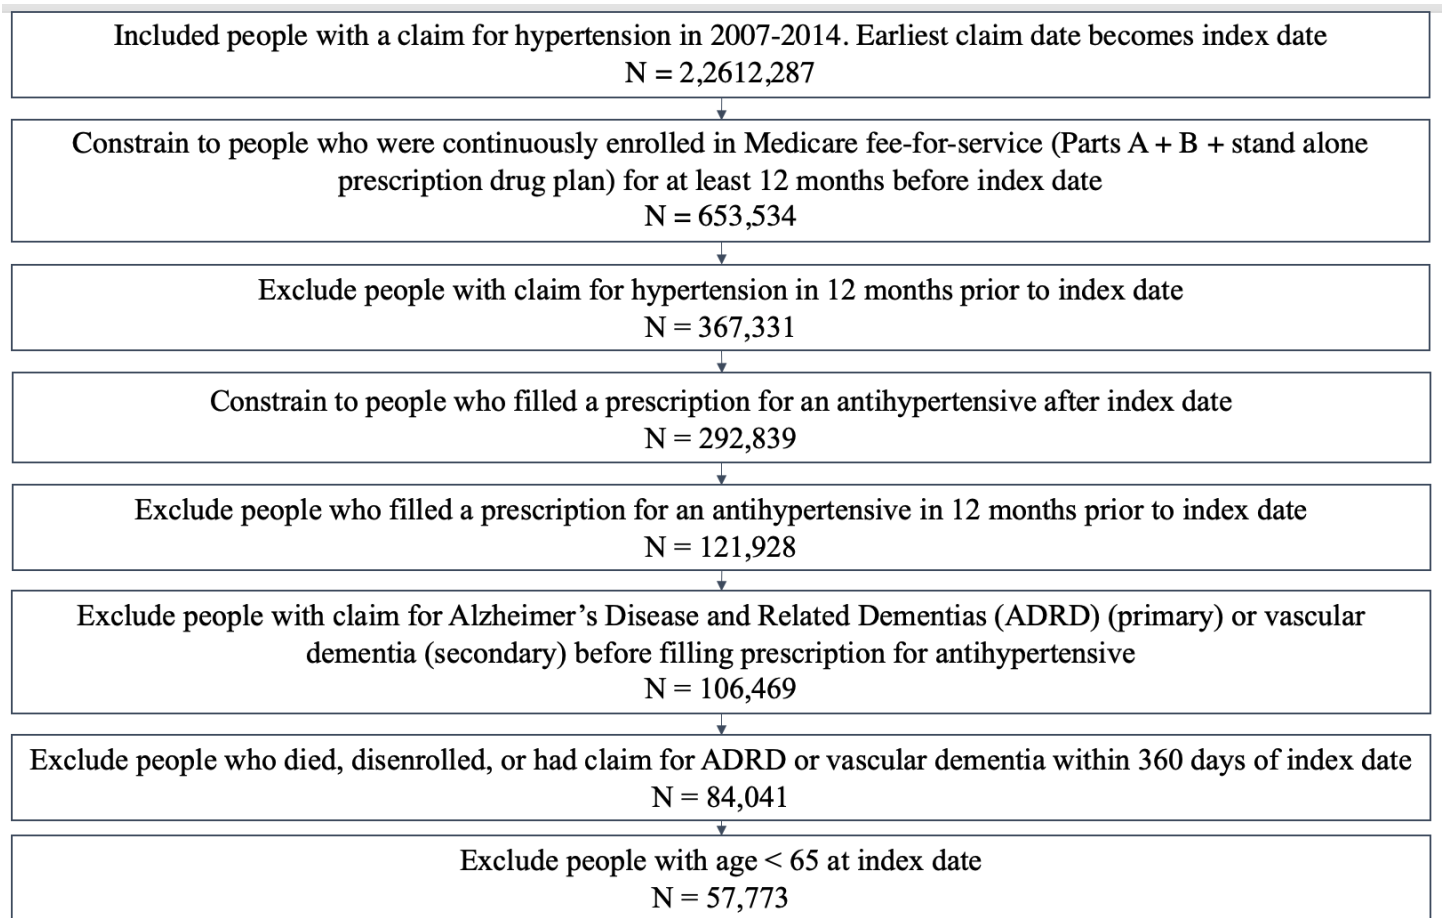

**eFigure 2.** Sankey Diagram of Exposure Groups by Time Period After Index Date

Distribution of Therapy Groups Over Time

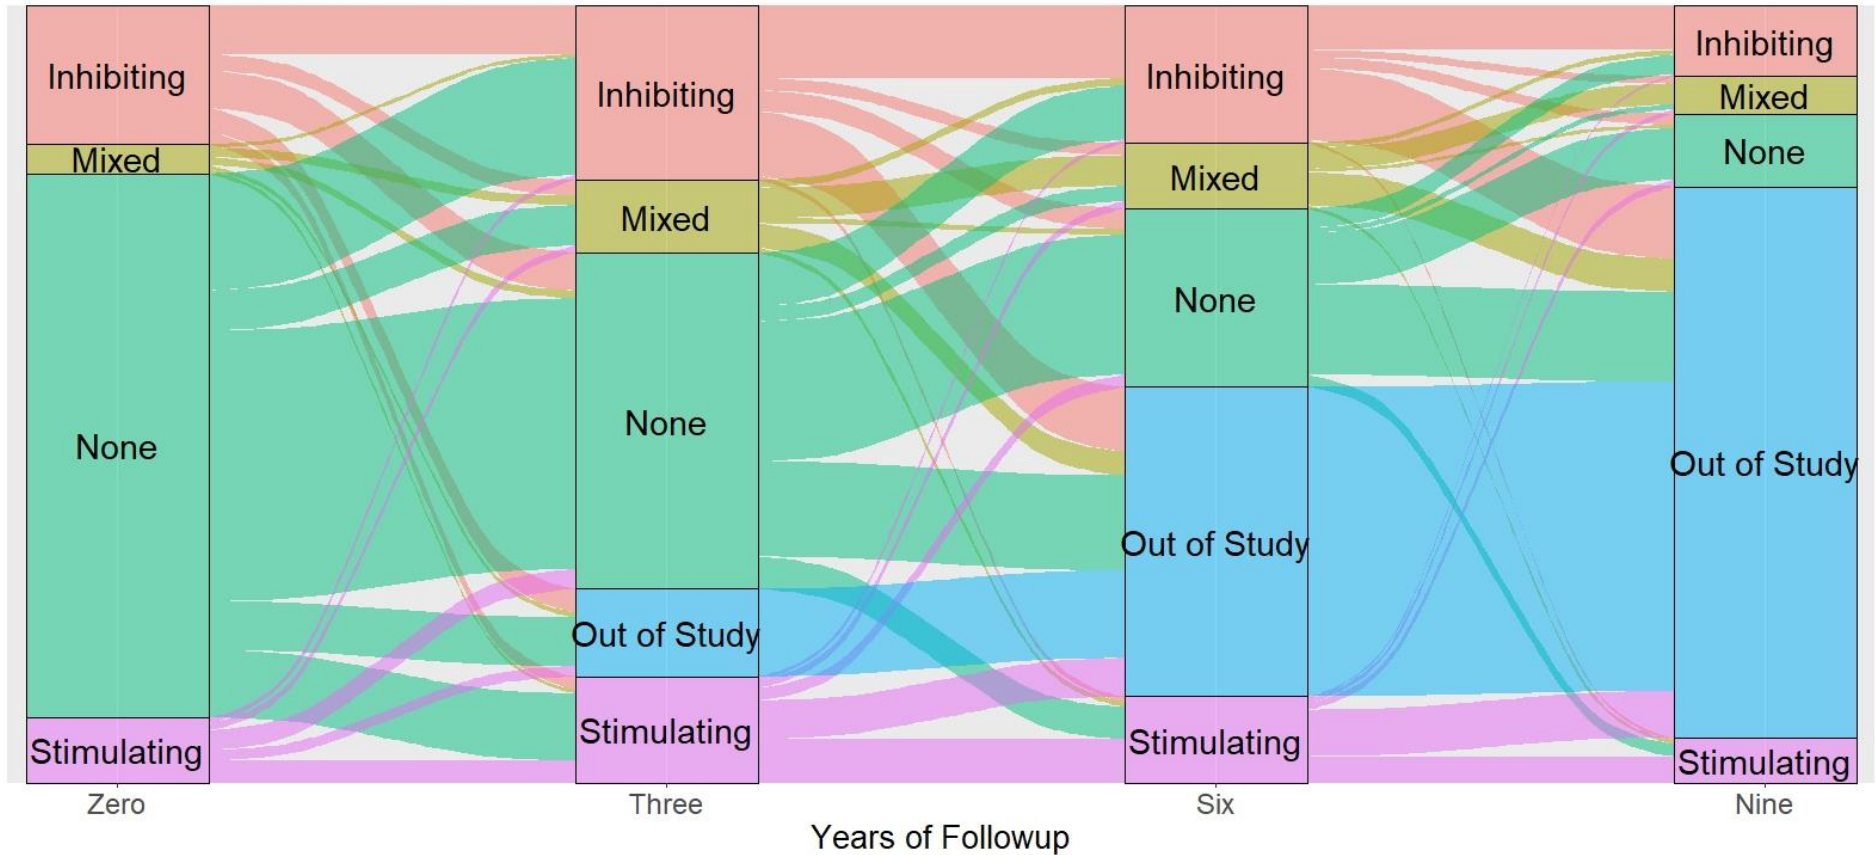

This figure shows transitions across time-dependent treatment groups over the study follow-up. Angiotensin II receptor type 2 and 4-stimulating antihypertensives defined as use of angiotensin II receptor blockers, dihydropyridine calcium channel blockers, and/or thiazides. Angiotensin II receptor type 2 and 4-inhibiting antihypertensives defined as use of angiotensin-converting enzyme inhibitors,  $\beta$ -blockers, and/or non-dihydropyridine calcium channel blockers. Mixed antihypertensive users defined as both angiotensin II receptor type 2 and 4-stimulating and -inhibiting antihypertensives. “Out of Study” is defined as an individual being censored.

**eFigure 3.** Results of Sensitivity Analysis - Multivariable Cox Proportional Hazards Model for Primary (ADRD) and Secondary (Vascular Dementia) Outcomes

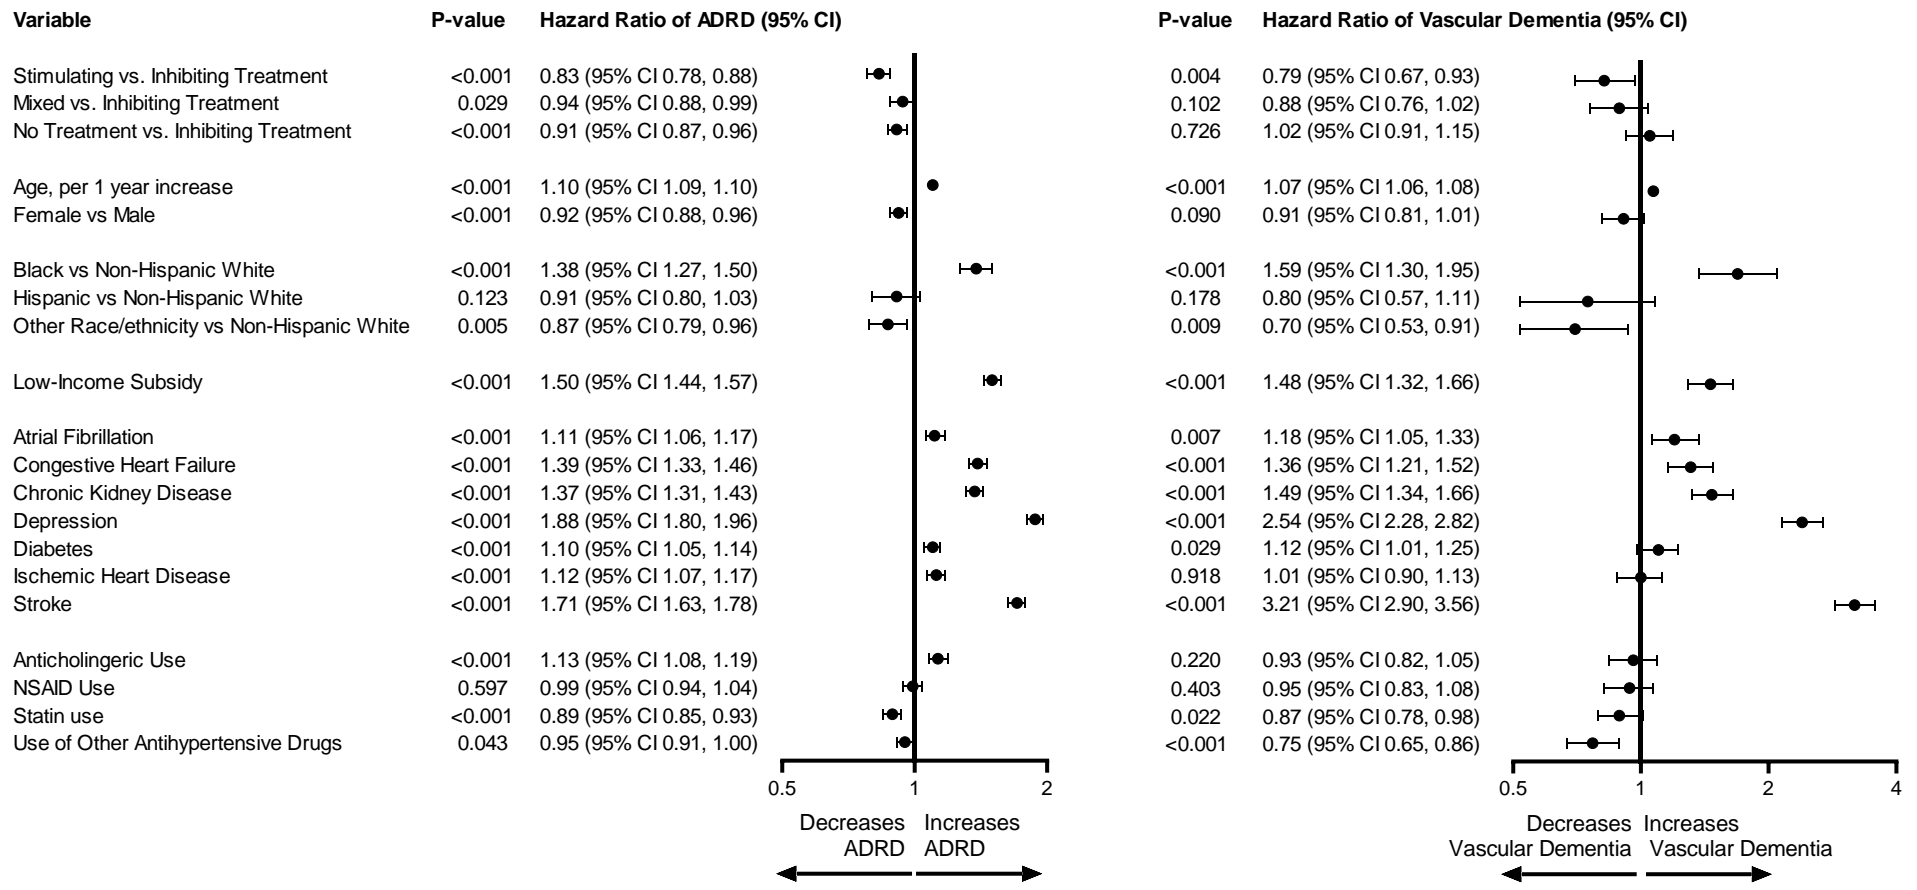

Abbreviations: ADRD, Alzheimer’s disease and related dementias; CI, confidence interval

This figure displays two separate multivariable Cox proportional hazards models for primary (ADRD) and secondary (vascular dementia) outcomes.

The stimulating group was defined as having at least 1 day of the 30-day interval with possession of stimulating antihypertensive medication and 0 days with possession of inhibiting medication. The inhibiting group was defined as having at least 1 day of the 30-day interval with possession of inhibiting antihypertensive medication and 0 days with possession of stimulating medication. The mixed group was defined as having at least 1 day of the 30-day interval with possession of inhibiting antihypertensive medication and at least 1 day with possession of stimulating antihypertensive medication. The non-users group was defined as having 0 days with possession of inhibiting antihypertensive medication and 0 days with possession of stimulating antihypertensive medication.

Angiotensin II receptor type 2 and 4-stimulating antihypertensives defined as use of angiotensin II receptor blockers, dihydropyridine calcium channel blockers, and/or thiazides. Angiotensin II receptor type 2 and 4-inhibiting antihypertensives defined as use of angiotensin-converting enzyme inhibitors, β-blockers, and/or non-dihydropyridine calcium channel blockers. Mixed antihypertensive users defined as both angiotensin II receptor type 2 and 4-stimulating and -inhibiting antihypertensives.
