# Supplementary material for: Association of New Use of Antihypertensives That Stimulate vs Inhibit Type 2 and 4 Angiotensin II Receptors With Dementia Among Medicare Beneficiaries
Source: PubMed Central journal article supplement (PMC9856661; doi:10.1001/jamanetworkopen.2022.49370), 2023-01-04
Supplement: jamanetwopen-e2249370-s002.pdf [file jamanetwopen-e2249370-s002.pdf]

## Data Sharing Statement

Marcum. Association of New Use of Antihypertensives That Stimulate vs Inhibit Type 2 and 4 Angiotensin II Receptors With Dementia Among Medicare Beneficiaries. *JAMA Netw Open*. Published January 04, 2023. doi:10.1001/jamanetworkopen.2022.49370

### Data

**Data available:** No

### Additional Information

**Explanation for why data not available:** Data was obtained under a data user agreement that explicitly prohibits data sharing.
